# Supplementary material for: Feasibility study and reflection on agro-industrial CO 2 point sources as feedstock for chemicals and materials
Source: Royal Society of Chemistry journal article supplement (doi:10.1039/d5se01283j), 2025-11-27
Supplement: d5se01283j7.pdf [file d5se01283j7.pdf]

Change log (hidden)

## Annex 7 Transport of carbon dioxide to central facility

This file calculates costs for compression and transport of CO<sub>2</sub> from the sugar factory to a large scale RWGS facility.

Get libraries

Include << .\Libraries\Units.mcdx

Include << .\Generic data.mcdx

$$p_E = 0.05 \frac{\text{€}}{\text{kW} \cdot \text{hr}}$$

Before transport, CO<sub>2</sub> needs to be compressed.

Cost of compression

$$C_{\text{compr}} := 21.3 \cdot \frac{\text{USD}}{\text{ton}} = 19.17 \frac{\text{€}}{\text{ton}} \quad \text{Chen and Morosuk (2021)}$$

Transport can be done by truck or ship.

$$C_{\text{truck}} := 0.103 \cdot \frac{\text{€}}{\text{ton} \cdot \text{km}} \quad \text{Meulen et al. (2020)}$$

$$C_{\text{ship}} := 0.039 \cdot \frac{\text{€}}{\text{ton} \cdot \text{km}}$$

$$\text{dist} := 60 \cdot \text{km}$$

Cosun Rozendaal naar Shell Pernis

$$C_{\text{truck}} \cdot 2 \cdot \text{dist} = 12.36 \frac{\text{€}}{\text{ton}} \quad \text{Up and down trip}$$

$$C_{\text{ship}} \cdot 2 \cdot \text{dist} = 4.68 \frac{\text{€}}{\text{ton}} \quad \text{Up and down trip}$$

Total costs of compression and transport

$$C_{\text{compr}} + C_{\text{truck}} \cdot 2 \cdot \text{dist} = 31.53 \frac{\text{€}}{\text{ton}}$$

In practice

$$\Phi_{CO_2} := 5 \cdot \frac{\text{ton}}{\text{hr}}$$

From sugar beet factory analysis

$$L_{truck} := 40 \cdot \text{ton}$$

$$L_{ship} := 700 \cdot \text{ton}$$

$$\frac{\Phi_{CO_2}}{L_{truck}} = 3 \frac{1}{\text{day}}$$

That is 3 trucks a day,

$$\frac{\Phi_{CO_2}}{L_{ship}} = 1.204 \frac{1}{\text{week}}$$

or one ship per week.

$$C_{ship} \cdot \Phi_{CO_2} \cdot 2 \cdot \text{dist} = (2.051 \cdot 10^5) \frac{\text{€}}{\text{yr}}$$

That would be less than a continuous use of one ship. This makes sense if we assume that 60 km plus on/off loading takes 1 day.

Literature

Chen and Morosuk (2021) [30]

Meulen et al. (2020) [31]
